# Supplementary material
Source: MDPI journal article supplement (https://www.mdpi.com/2073-4441/15/6/1185)
Supplement: s1 [file s1]

Supplementary Material

Water

## **Marine hazard assessment of soluble and nanostructured forms of the booster biocide DCOIT in tropical waters**

Fernando Perina <sup>1,2\*</sup>, Cristiane Ottoni <sup>2,3</sup>, Juliana Santos <sup>2</sup>, Vithória Santos <sup>1,4</sup>, Mariana Silva <sup>2</sup>, Bruno Campos <sup>2</sup>, Myana Fontes <sup>2</sup>, Debora Santana <sup>2</sup>, Frederico Maia <sup>5</sup>, Denis Abessa <sup>2</sup> and Roberto Martins <sup>1</sup>

<sup>1</sup> CESAM-Centre for Environmental and Marine Studies and Department of Biology, University of Aveiro, 3810-193 Aveiro, Portugal.

<sup>2</sup> Biosciences Institute, São Paulo State University (UNESP), 11330-900 São Vicente/SP, Brazil.

<sup>3</sup> LEAF-Linking Landscape, Environment, Agriculture and Food Research Center, Associated Laboratory TERRA, Instituto Superior de Agronomia, Universidade de Lisboa, Tapada da Ajuda, 1349-017 Lisboa, Portugal.

<sup>4</sup> Institute of Advanced Sea Studies (IEAMAR), São Paulo State University (UNESP), São Vicente/SP, Brazil.

<sup>5</sup> Smallmatek - Small Materials and Technologies, Lda, 3810-075 Aveiro, Portugal.

\* Correspondence: [perinafc@ua.pt](mailto:perinafc@ua.pt)

*\*Corresponding author*

Fernando Cesar Perina

E-mail address: [perinafc@ua.pt](mailto:perinafc@ua.pt)

**S1. Standard curve of calibration (absorbance x cell density) - *Chlorella minutissima***

| cell/mL | Abs<br>(680 nm) |
|---------|-----------------|
| 2500    | 0.008           |
| 5000    | 0.015           |
| 10000   | 0.025           |
| 20000   | 0.05            |
| 40000   | 0.125           |
| 80000   | 0.192           |
| 160000  | 0.449           |

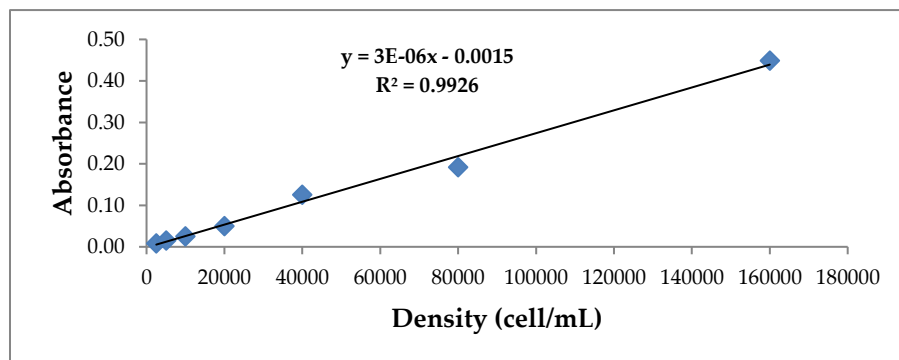

**Figure S1.** Absorbance at 680 nm of *Chlorella minutissima* culture as a function of cell concentration.
